# Supplementary material for: ZIF-8-Derived Hollow Carbon for Efficient Adsorption of Antibiotics
Source: MDPI journal article supplement (doi:10.3390/nano9010117), 2019-01-18
Supplement: s1 [file s1]

## ZIF-8-Derived Hollow Carbon for Efficient Adsorption of Antibiotics

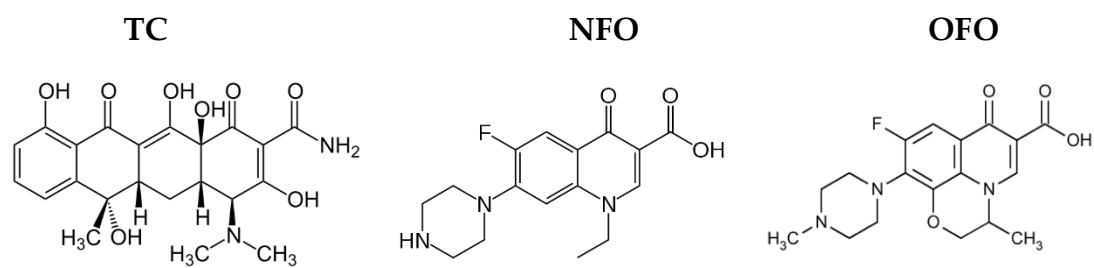

**Figure S1.** The chemical structure of TC, NFO, and OFO.

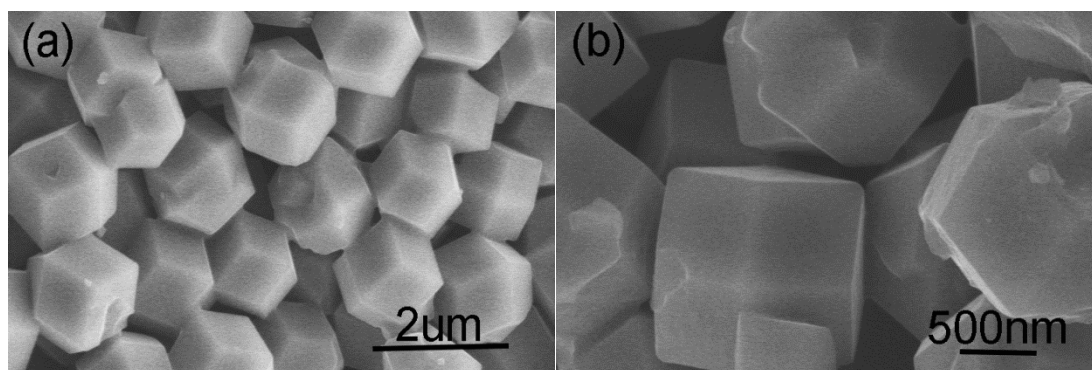

**Figure S2.** The Low-(a) and High-magnification (b) SEM images of the synthesized ZIF-8 without CTAB.

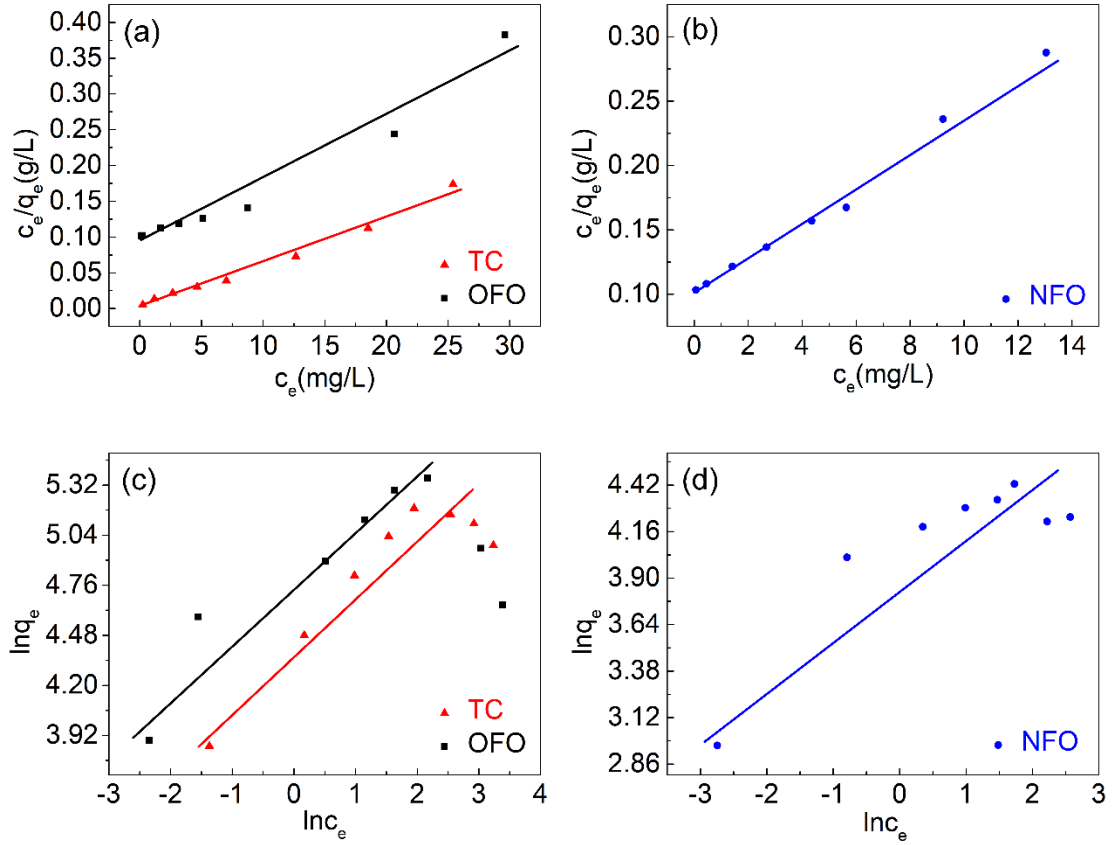

**Figure S3.** The isothermal adsorption fitting curves of Langmuir (a,b) and Freundlich (c,d) for TC, OFO and NFO by ZIF-8.

**Figure S3** describe the isothermal adsorption fitting curves of Langmuir (Fig S3a, 3b) and Freundlich (Fig S3c, S3d) for TC, OFO and NFO by pure ZIF-8. Langmuir calculation showed that the maximum adsorption capacity of pure ZIF-8 for TC, OFO and NFO was 119.04, 111.48 and 38.69 mg g<sup>-1</sup>, respectively.
